# Supplementary material
Source: publisher figshare collection journal article supplement (https://frontiersin.figshare.com/ndownloader/files/10588897)
Supplement: Supplementary file [file 10588897]

Zelazo, P. D., Forston, J. L., Masten, A. S., & Carlson, S. M. (2018). Mindfulness plus reflection training: Effects on executive function in early childhood. *Frontiers in Psychology*.

Please address correspondence to: Philip David Zelazo, Institute of Child Development, University of Minnesota, 51 East River Road, Minneapolis, MN 55455-0345. E-mail: [zelazo@umn.edu](mailto:zelazo@umn.edu).

## Appendix

### Examples of exercises used in the Mindfulness + Reflection intervention

The 14 mindfulness exercises:

- Lesson 1-- **Getting to Know You, Getting to Know Your Breath**
- Lesson 2-- **The Breath in My Body**
- Lesson 3-- **Introduction to Body Scan, Sound in Space**
- Lesson 4-- **Body Scan and Mindfulness Journals**
- Lesson 5-- **Mindful Movement and Deep Body Scan**
- Lesson 6-- **Deep Body Scan and Mindfulness Journals, Cheerios box**
- Lesson 7-- **Mindful Seeing**
- Lesson 8-- **Mindful Hearing, Egg Carton Game**
- Lesson 9-- **Mindful Touch, “What’s Behind My Back?” game**
- Lesson 10-- **Mindful Smelling Mindfulness Journal blank pages**
- Lesson 11-- **Mindful Taste**
- Lesson 12-- **Interconnectedness book: Who Put the Cookies in the Cookie Jar?**
- Lesson 13-- **Baking Soda in Water and You Are Not Your Thoughts book**
- Lesson 14-- **Snow Globe/Glitter ball activity**

Each lesson begins with a greeting, and ends with friendly wishes and a song (Be Well). New practices are introduced that are relevant to the Lesson theme, and some previously introduced practices are repeated in later lessons. The first 3 lessons provide an example:

- Lesson 1-- **Getting to Know You, Getting to Know Your Breath**
  - Greeting
  - Parachute breathing**
  - Sleeping lions (Wemoweh song)**
  - Be Well Song

**Lesson 2-- The Breath in My Body**

Greeting

**Breathing ball****Pinwheel****Starfish****Sleeping beanies breath**

Friendly wishes

Be Well Song

**Lesson 3-- Introduction to Body Scan, Sound in Space**

Greeting

**Tic Toc****Breathing ball****Body scan with hula hoop****Sound in Space game (Tone bar)****Sleeping beanies breathe**

Friendly wishes

Be Well Song

**Sources:**

Flook, L., Smalley, S. L., Kitil, M. J., Galla, B., Kaiser-Greenland, S., Locke, J., Ishijima, E., Kasari, C. (2010). Effects of mindful awareness practices on executive functions in elementary school children. *Journal of Applied School Psychology*, 26(1), 70-95.

Kaiser Greenland, S. (2010). *The mindful child: How to help your kid manage stress and become happier, kinder, and more compassionate*. New York: Free Press.

Saltzman, A. (2014). *A still quiet place: A mindfulness program for teaching children and adolescents to ease stress and difficult emotions*. Oakland, CA: New Harbinger.

Schoeberlein, D., & Koffler, T. (2005). *Garrison Institute report: Contemplation and education: A survey of programs using contemplative techniques in K–12 educational settings: A mapping report*. New York: Garrison Institute.

Willard, C. (2010). *Child's mind: Mindfulness practices to help our children be more focused, calm, and relaxed*. Berkeley, CA: Parallax Press.
